# Supplementary material
Source: publisher figshare collection journal article supplement (https://frontiersin.figshare.com/ndownloader/files/30724490)
Supplement: Supplementary file 1 [file 30724490]

Table S4. Body size values of *P. yessoensis* and *C. farreri* used for tissue expression analysis of *FMO* genes.

|  | Shell height (mm) | Shell length (mm) | Shell width (mm) | Body weight (g) |
| --- | --- | --- | --- | --- |
| *P.yessoensis*_1 | 86.2 | 85.8 | 22.0 | 80.5 |
| *P.yessoensis*_2 | 95.2 | 93.1 | 25.7 | 112.1 |
| *P.yessoensis*_3 | 93.6 | 92.0 | 24.1 | 111.7 |
| *C. farreri*_1 | 59.0 | 53.0 | 19.0 | 32.5 |
| *C. farreri*_2 | 60.8 | 60.0 | 21.6 | 37.4 |
| *C. farreri*_3 | 57.2 | 54.1 | 18.1 | 26.7 |
